# Supplementary material for: Rational Optimization of Cathode Composites for Sulfide-Based All-Solid-State Batteries
Source: MDPI journal article supplement (doi:10.3390/nano13020327), 2023-01-12
Supplement: s1 [file s1]

# Rational Optimization of Cathode Composites for Sulfide-Based All-Solid-State Batteries

Artur Tron \*, Raad Hamid, Ningxin Zhang and Alexander Beutl \*

AIT Austrian Institute of Technology GmbH, Center for Low-Emission Transport, Battery Technologies,  
Giefinggasse 2, 1210 Vienna, Austria

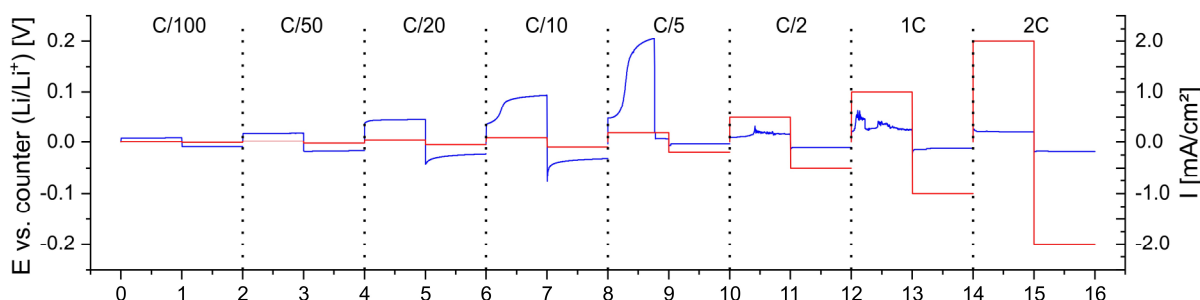

**Figure S1.** critical current density of  $\text{Li}_6\text{PS}_5\text{Cl}$  electrolyte membrane. A current density of 1C corresponds to  $1 \text{ mA/cm}^2$ . The measurement was conducted by sandwiching a  $300 \mu\text{m}$  thick electrolyte membrane in-between two Li electrodes of 16 mm diameter and applying 10 MPa of pressure.

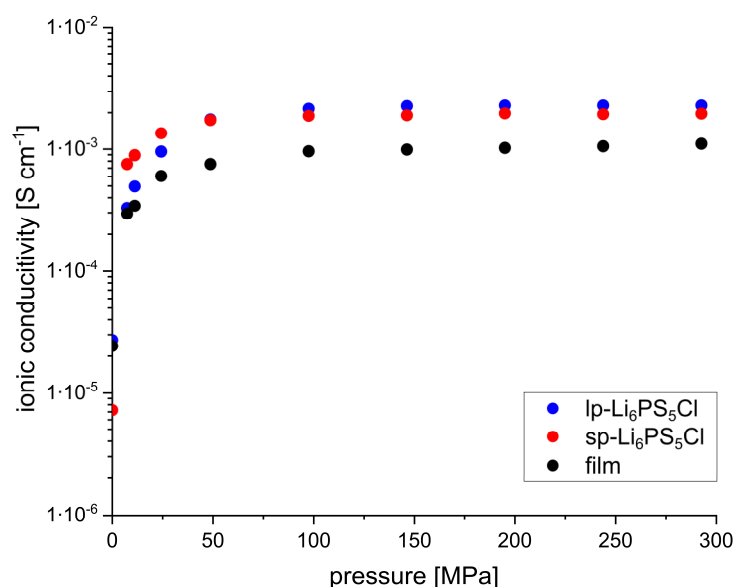

**Figure S2.** ionic conductivity vs. pressure plots for powder pellets using lp-, sp- $\text{Li}_6\text{PS}_5\text{Cl}$ , and the prepared electrolyte films.

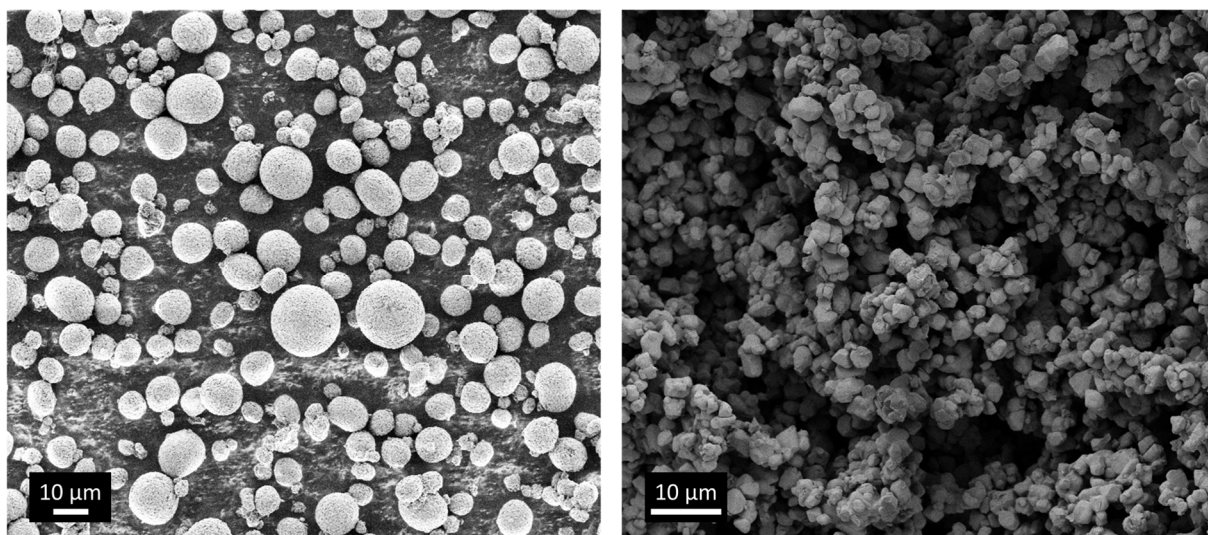

Figure S3. SEM micrographs of p-NMC811 (left) and s-NMC811 (right).

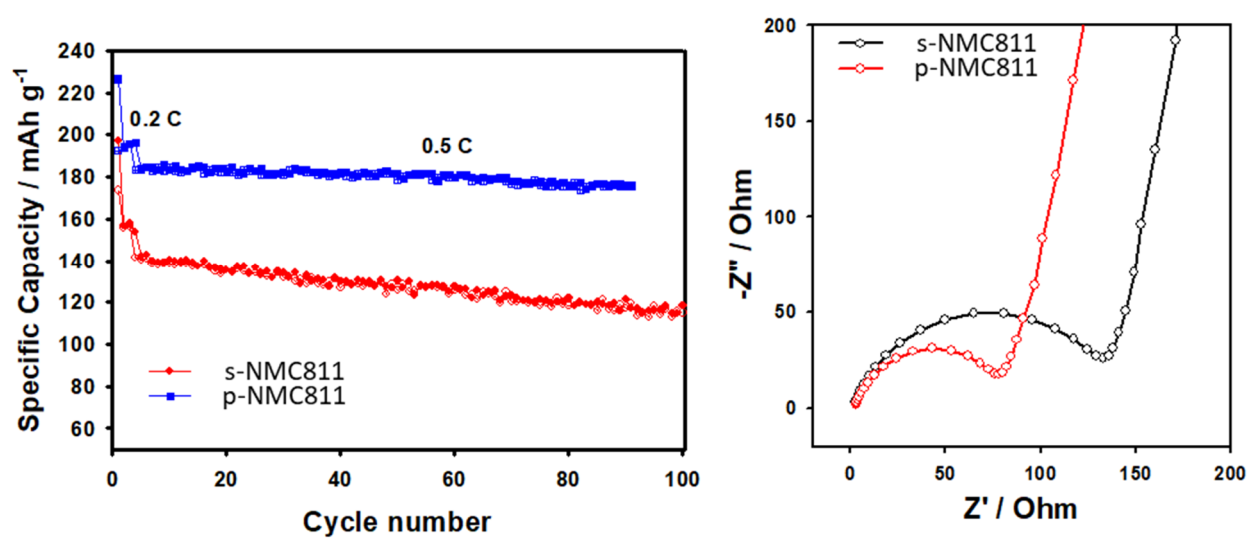

Figure S4. cycling performance of s-NMC811 and p-NMC811 in 1 M LiPF<sub>6</sub> in EC/DEC 1:1 vol./vol.).

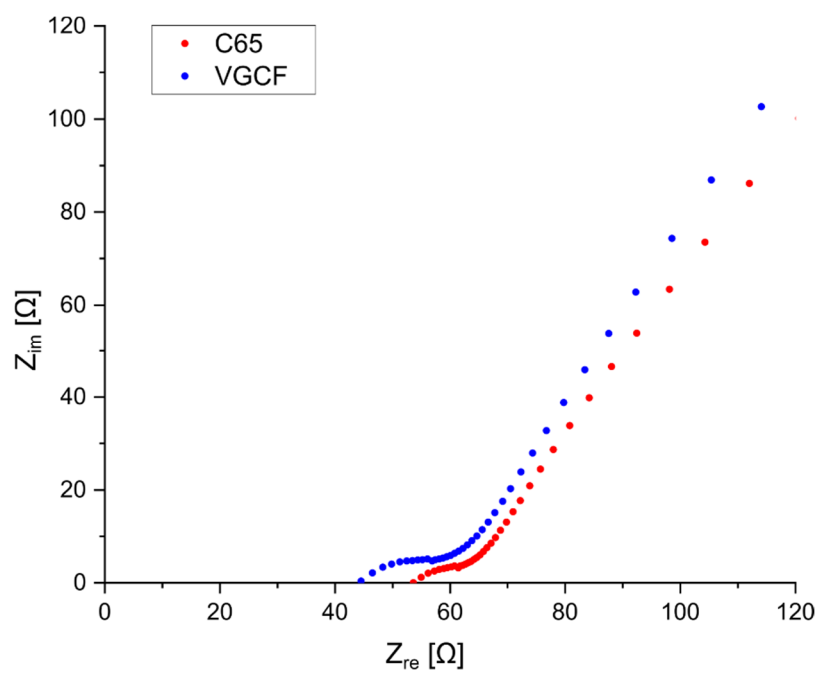

**Figure S5.** EIS data before cycling of electrodes, with C65 and VGCF as conductive additives.

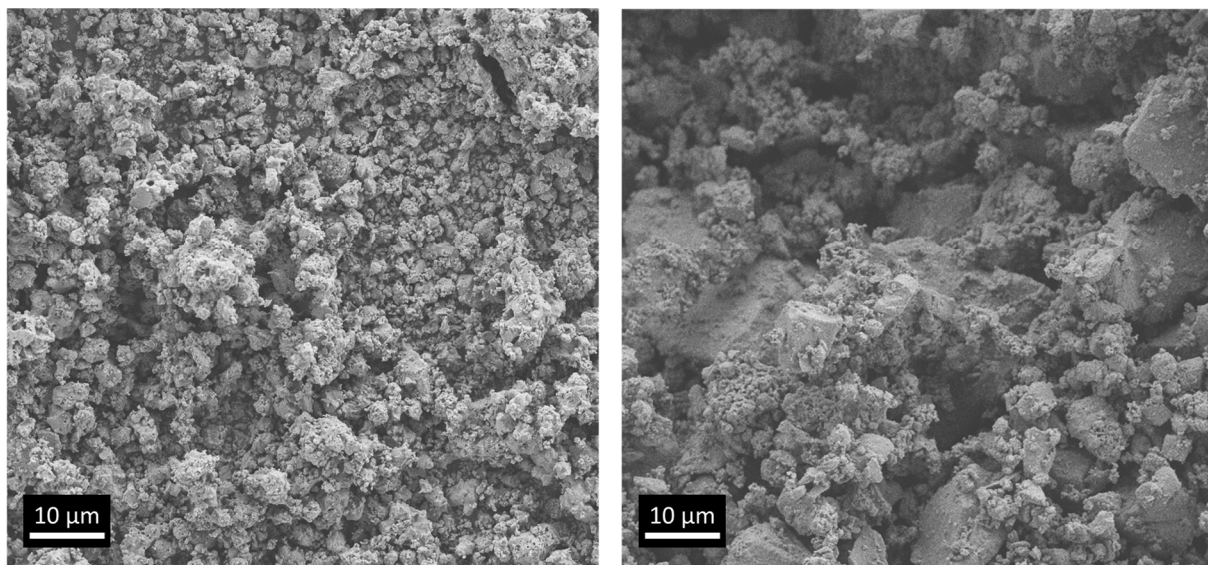

**Figure S6.** SEM micrographs of sp-Li<sub>6</sub>PS<sub>5</sub>Cl (left) and lp-Li<sub>6</sub>PS<sub>5</sub>Cl (right).

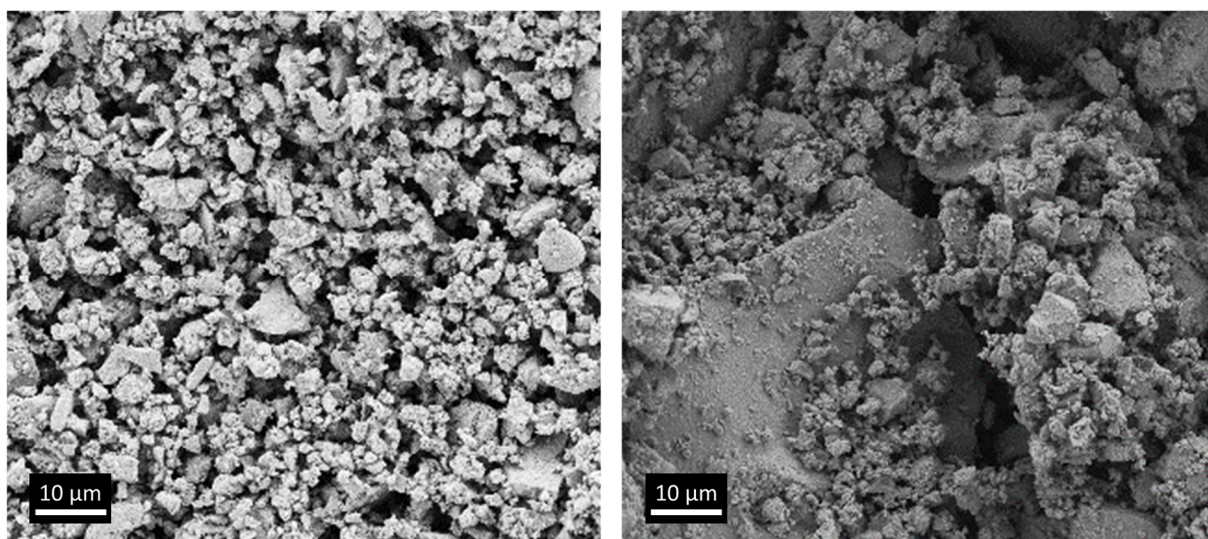

**Figure S7.** SEM micrographs of lp-Li<sub>6</sub>PS<sub>5</sub>Cl and lp-Li<sub>6</sub>PS<sub>5</sub>Cl (ball milled).

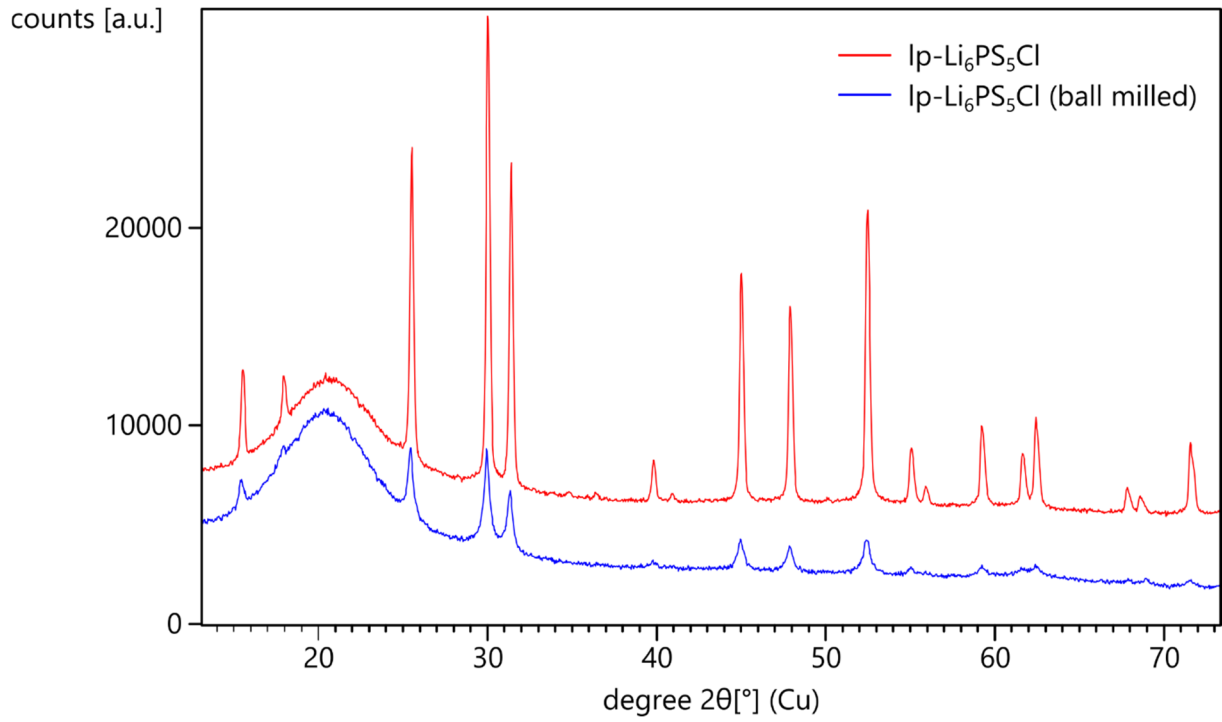

**Figure S8.** XRD pattern of lp-Li<sub>6</sub>PS<sub>5</sub>Cl and lp-Li<sub>6</sub>PS<sub>5</sub>Cl (ball milled).

**Table S1.** list of all composite cathode formulations used in this work.

|    | AM       | SE                                                  | CA   | BM  | AM:CA:SE:BM<br>[wt./wt.] | AM:CA:SE:BM<br>[vol./vol.] | AM:SE [vol./vol.] |
|----|----------|-----------------------------------------------------|------|-----|--------------------------|----------------------------|-------------------|
| 1  | p-NMC811 | sp-Li <sub>6</sub> PS <sub>5</sub> Cl               | C65  | -   | 67:3:30:0                | 40:5:55:0                  | 42:58             |
| 2  | s-NMC811 | sp-Li <sub>6</sub> PS <sub>5</sub> Cl               | C65  | -   | 67:3:30:0                | 40:5:55:0                  | 42:58             |
| 3  | s-NMC811 | sp-Li <sub>6</sub> PS <sub>5</sub> Cl               | VGCF | -   | 67:3:30:0                | 40:5:55:0                  | 42:58             |
| 4  | s-NMC811 | lp-Li <sub>6</sub> PS <sub>5</sub> Cl               | C65  | -   | 67:3:30:0                | 40:5:55:0                  | 42:58             |
| 5  | s-NMC811 | lp-Li <sub>6</sub> PS <sub>5</sub> Cl (ball-milled) | C65  | -   | 67:3:30:0                | 40:5:55:0                  | 42:58             |
| 6  | s-NMC811 | sp-Li <sub>6</sub> PS <sub>5</sub> Cl               | C65  | -   | 64:3:33:0                | 38:5:57:0                  | 40:60             |
| 7  | s-NMC811 | sp-Li <sub>6</sub> PS <sub>5</sub> Cl               | C65  | -   | 73:3:24:0                | 48:5:47:0                  | 50:50             |
| 8  | s-NMC811 | sp-Li <sub>6</sub> PS <sub>5</sub> Cl               | C65  | -   | 79:3:18:0                | 57:5:38:0                  | 60:40             |
| 9  | s-NMC811 | sp-Li <sub>6</sub> PS <sub>5</sub> Cl               | C65  | -   | 85:3:12:0                | 66:5:29:0                  | 70:30             |
| 10 | s-NMC811 | sp-Li <sub>6</sub> PS <sub>5</sub> Cl               | C65  | -   | 90:3:7:0                 | 77:5:18:0                  | 80:20             |
| 11 | s-NMC811 | sp-Li <sub>6</sub> PS <sub>5</sub> Cl               | C65  | SBS | 74.5:2.5:20.5:2.5        | 48:5:39:8                  | 55:45             |
| 12 | s-NMC811 | sp-Li <sub>6</sub> PS <sub>5</sub> Cl               | C65  |     | 76:3:21:0                | 52:5:43:0                  | 55:45             |
| 13 | s-NMC811 | sp-Li <sub>6</sub> PS <sub>5</sub> Cl               | C65  |     | 81:3:16                  | 60:5:35                    | 63:37             |
